# Supplementary material for: Co-Opted Megasatellite DNA Drives Evolution of Secondary Night Vision in Azara's Owl Monkey
Source: PubMed Central journal article supplement — Genome Biol Evol. 2017 Jul 27;9(7):1963–70. doi: 10.1093/gbe/evx142 (PMC5553404; doi:10.1093/gbe/evx142), 2017-07-27
Supplement: evx142_SuppFig.pdf [file evx142_SuppFig.pdf]

## Supplementary Material

### Legends to supplementary figures

**Fig. S1.** Three-dimensional FISH analysis of the outer nuclear layer of a retina section. Photographs of multiple cross-sections were taken along the z axis, for a region of the outer nuclear layer that contained approximately 20 rod nuclei.

**Fig. S2.** Three-dimensional FISH analysis of a single rod nucleus. A typical single nucleus, indicated by a square in Figure 2, was selected and analyzed with a higher magnification than that used for the images in Supplementary Figure S1.

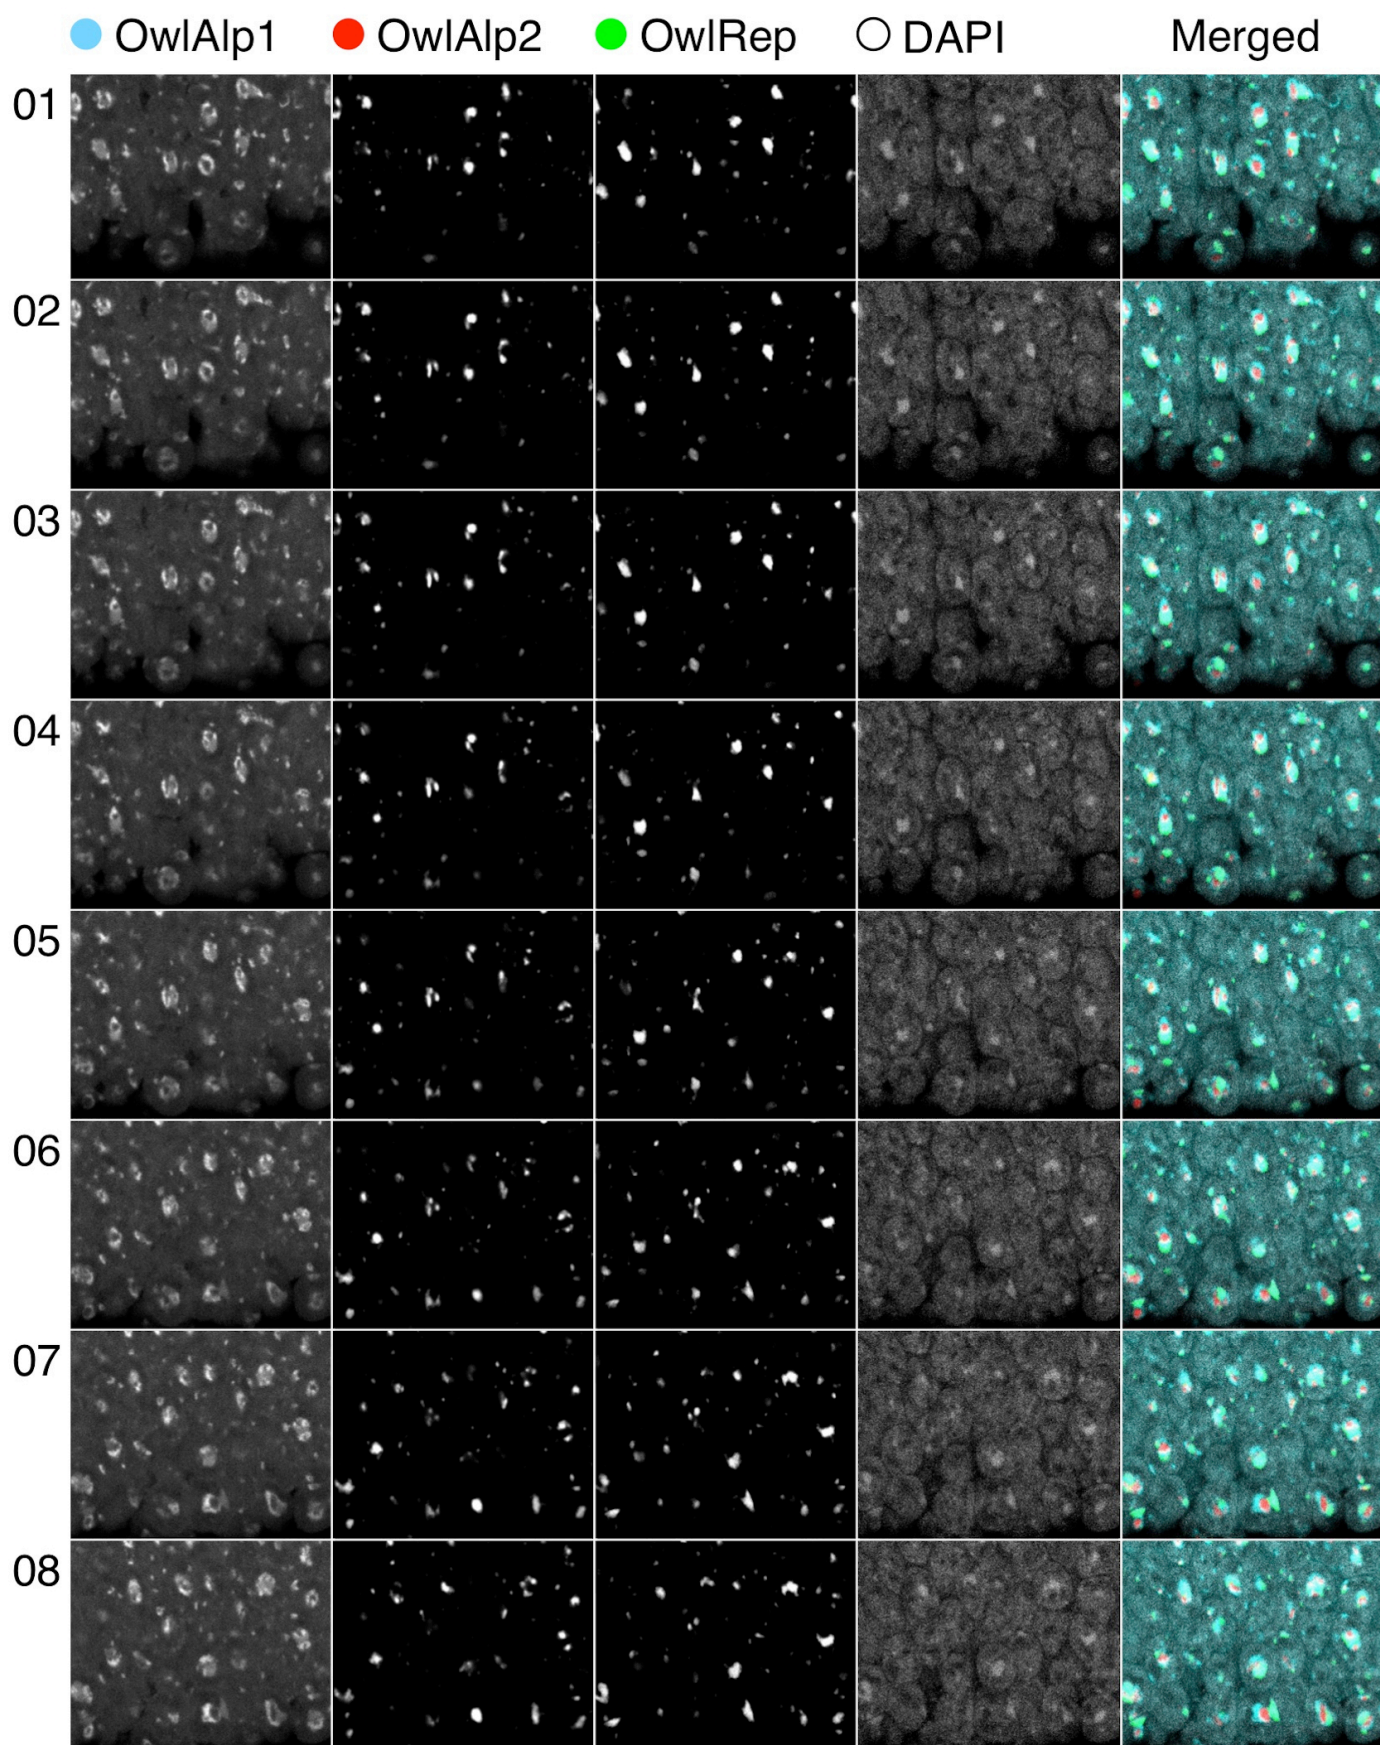

Figure S1 (1 of 3)

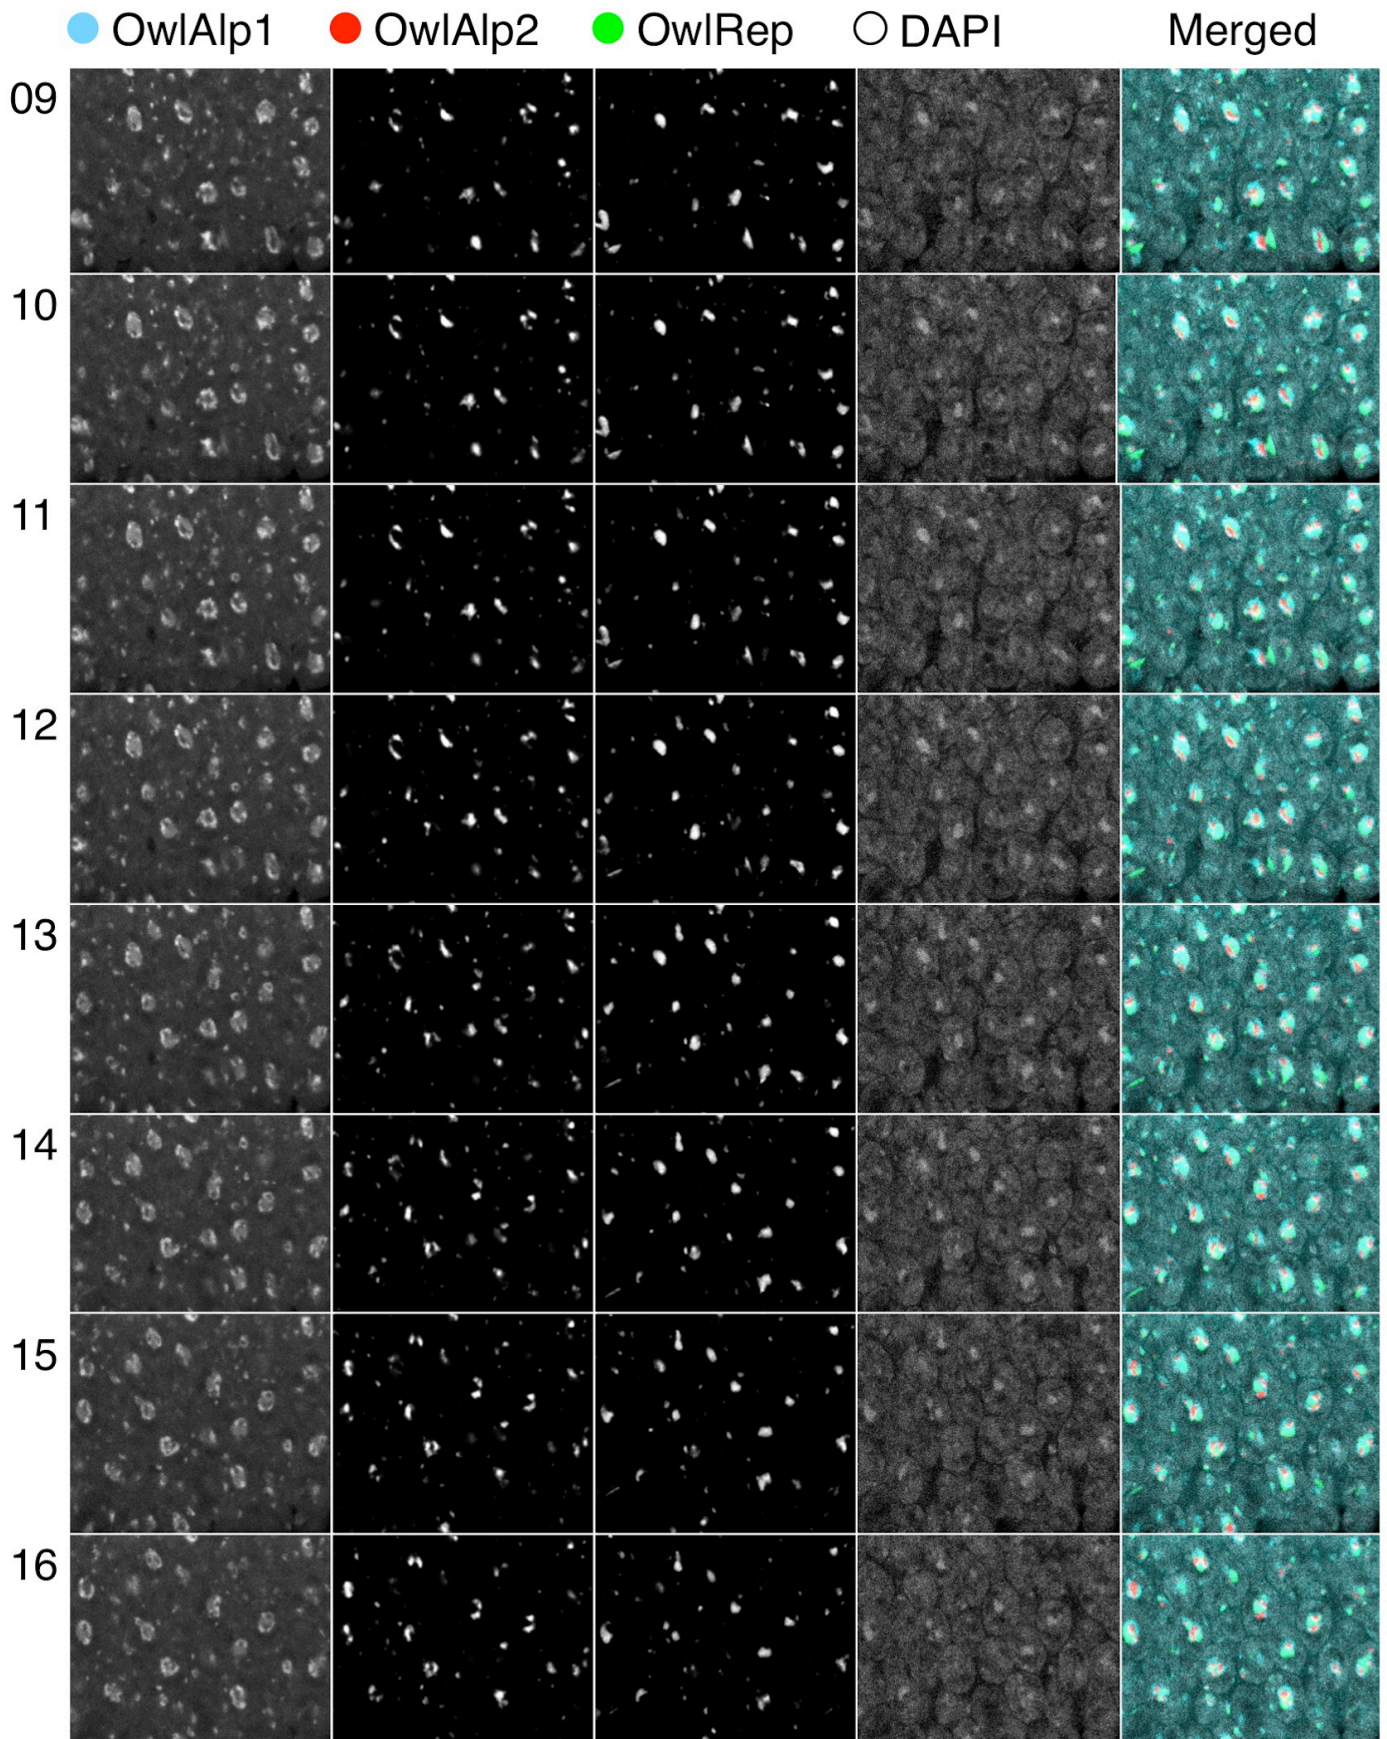

Figure S1 (2 of 3)

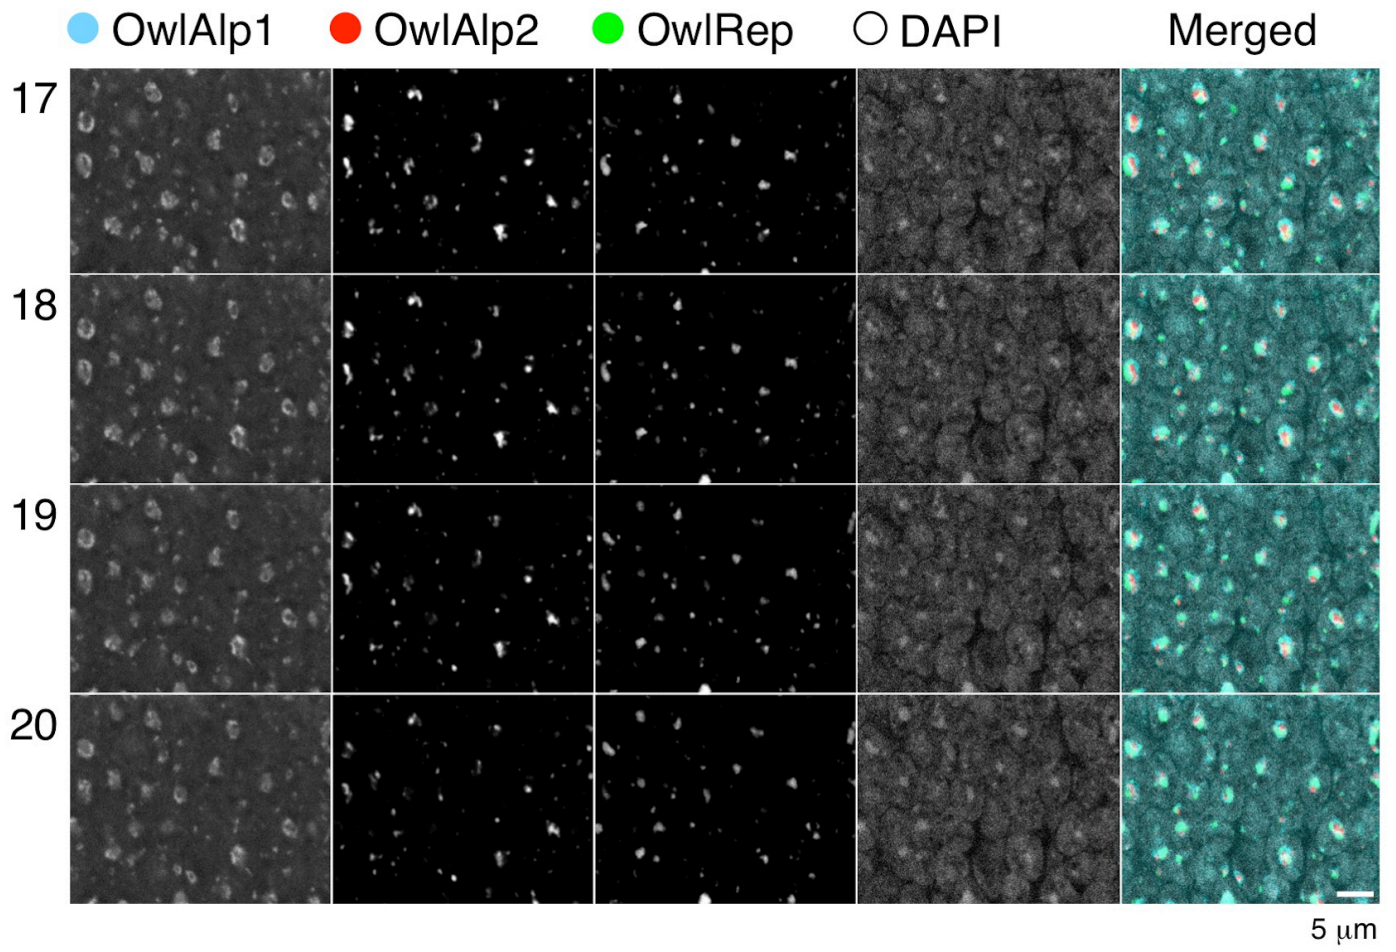

Figure S1 (3 of 3)

● OwlAlp1 ● OwlAlp2 ● OwlRep ○ DAPI Merged

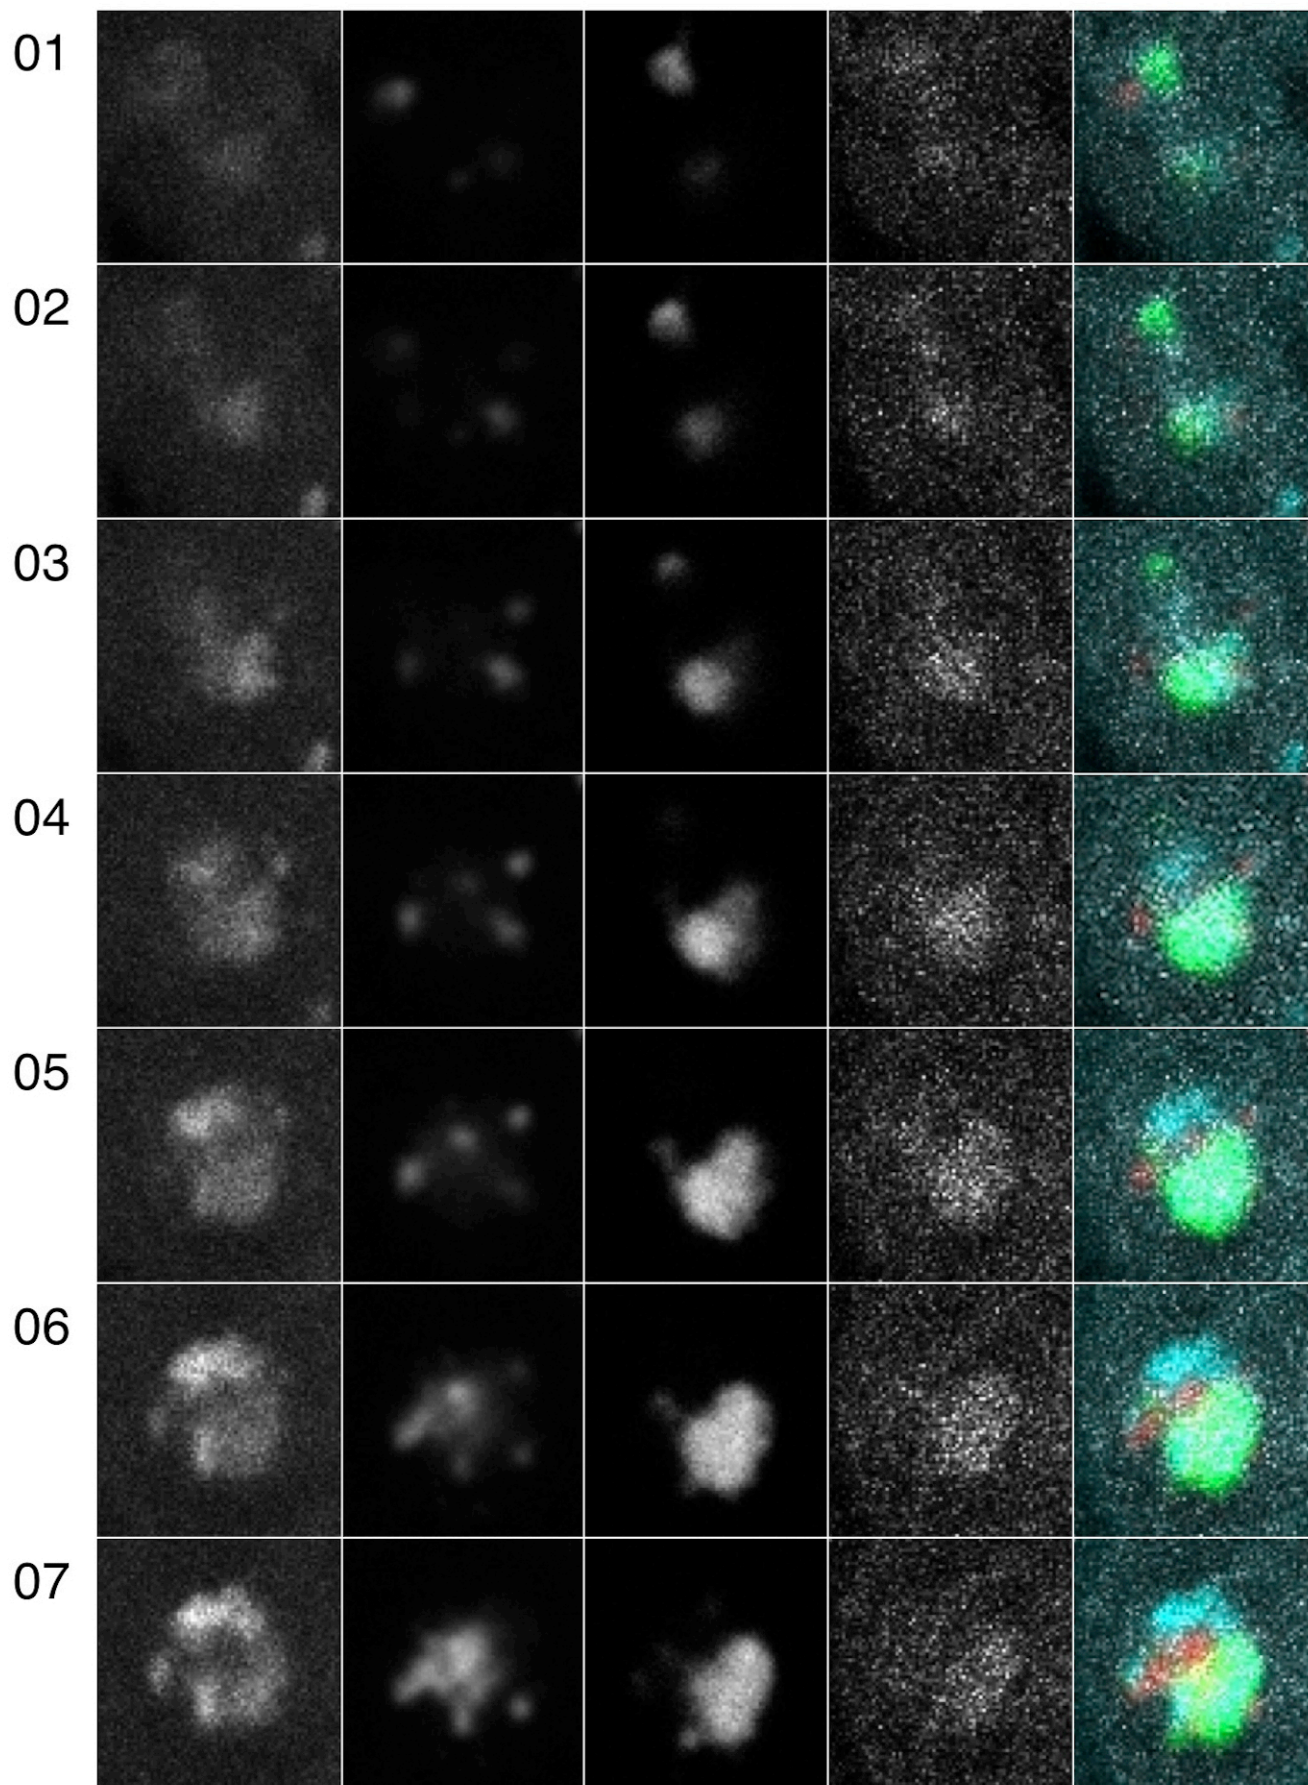

Figure S2 (1 of 2)

● OwlAlp1 ● OwlAlp2 ● OwlRep ○ DAPI Merged

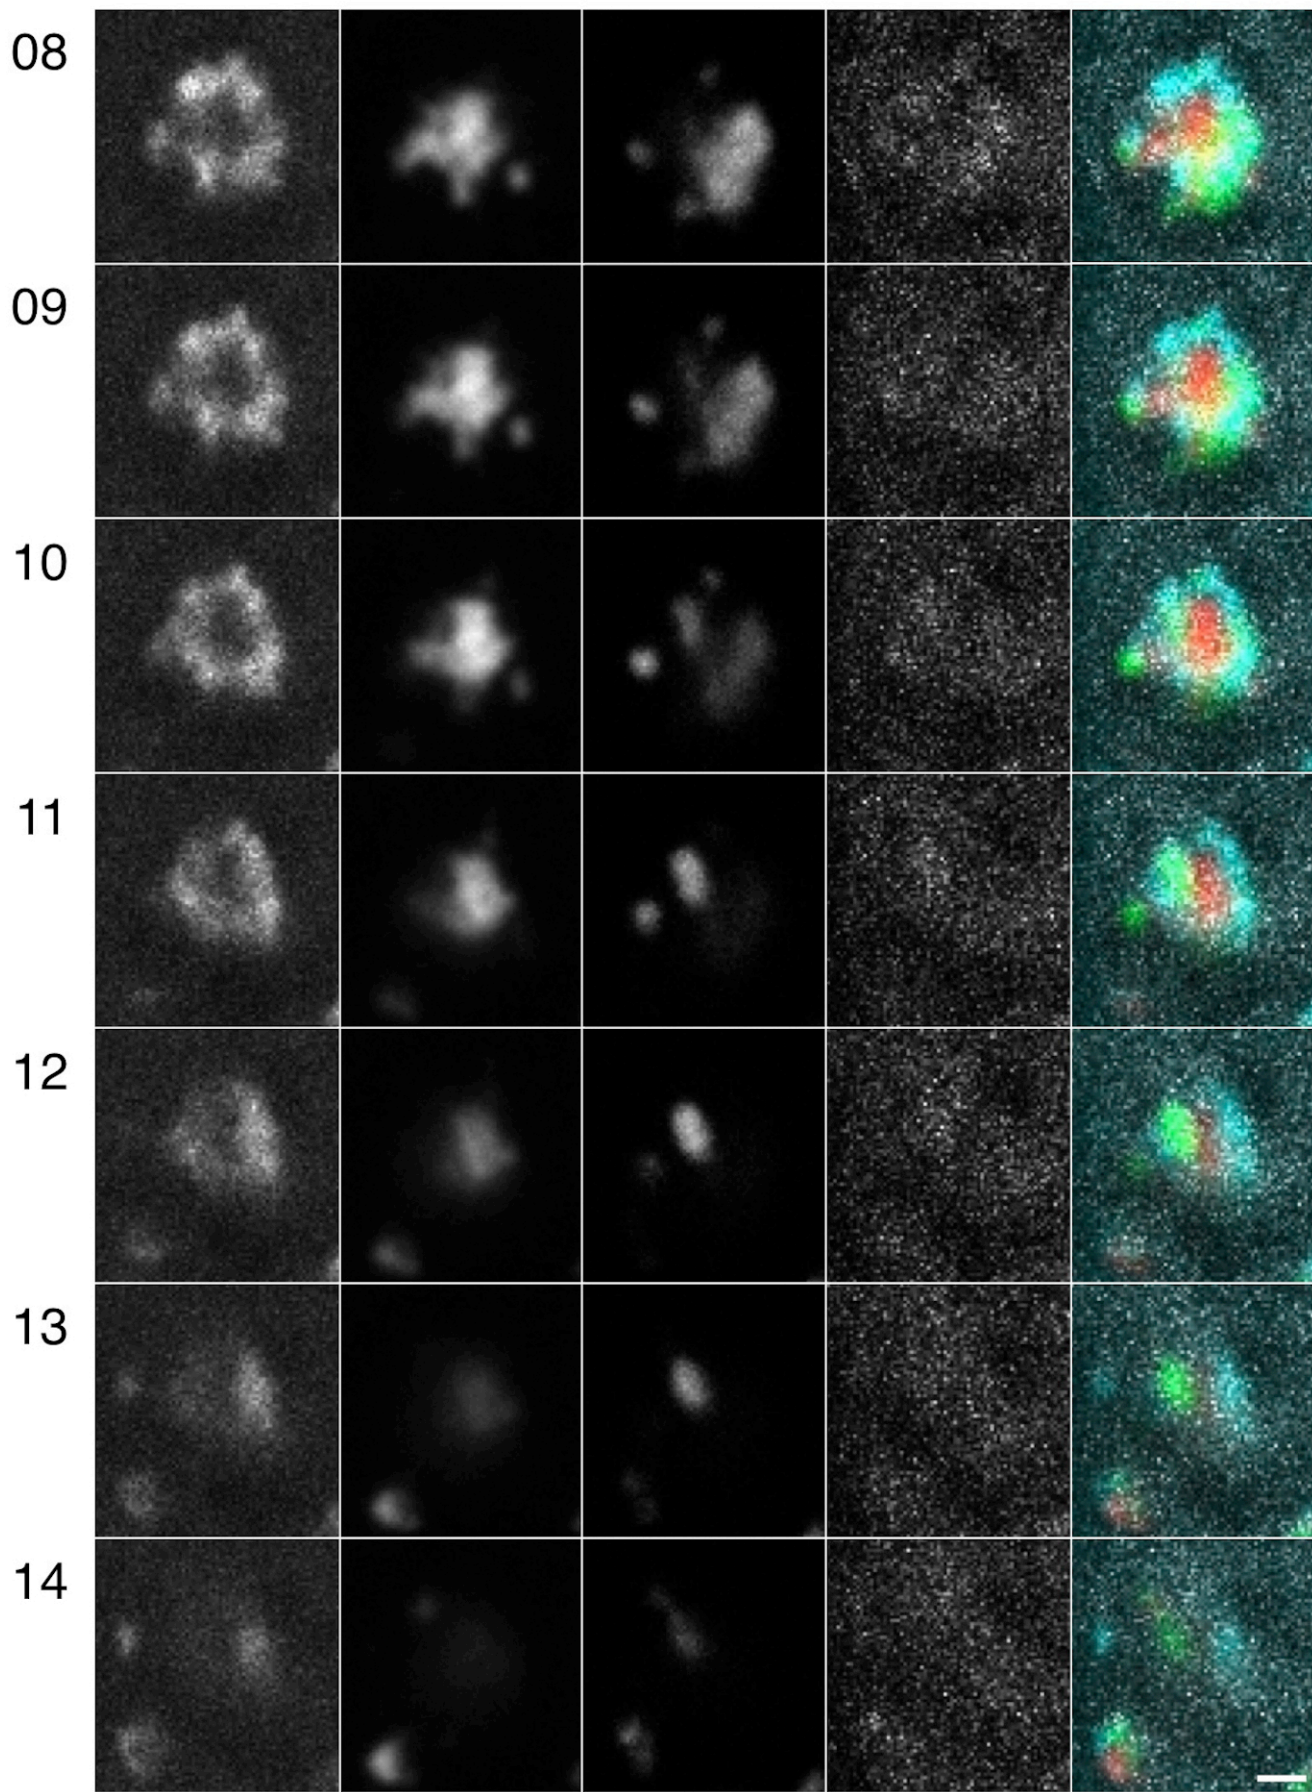

1 μm

Figure S2 (2 of 2)
